# Supplementary material
Source: Atypon-hosted journal article supplement (doi:10.1287/ijoc.2025.1443)
Supplement: ijoc.2025.1443.sm1.pdf [file ijoc.2025.1443.sm1.pdf]

# Online Supplement

## Tackling Arbitrarily Heterogeneous Data in Asynchronous SGD without Worker Scheduling

Xiaolu Wang

Yuchang Sun

Hoi-To Wai

Jun Zhang

### 1 Notation for Conditional Expectations

For notational simplicity, we define

$$\mathbb{E}_P[h(P, Q)] := \mathbb{E}[h(P, Q) \mid Q]$$

for random variables  $P, Q$  and a measurable function  $h$ , which represents the *conditional expectation* with respect to  $P$  while holding  $Q$  fixed.

Throughout the Appendix, we frequently encounter terms of the form  $\mathbb{E}_{\xi_i^{t-\rho_i(t)}} \left[ \nabla f_i \left( \mathbf{w}^{t-\tau_i(t)}; \xi_i^{t-\rho_i(t)} \right) \right]$  with  $t - \rho_i(t) > t - \tau_i(t)$ . By definition, this denotes the conditional expectation over the sample  $\xi_i^{t-\rho_i(t)}$  given the current iterate  $\mathbf{w}^{t-\tau_i(t)}$  (equivalently, given the sigma algebra  $\mathcal{F}_{t-\tau_i(t)}$  generated by the history up to time  $t - \tau_i(t)$ ). Since  $\mathbf{w}^{t-\tau_i(t)}$  is  $\mathcal{F}_{t-\tau_i(t)}$ -measurable, we have

$$\mathbb{E}_{\xi_i^{t-\rho_i(t)}} \left[ \nabla f_i \left( \mathbf{w}^{t-\tau_i(t)}; \xi_i^{t-\rho_i(t)} \right) \right] = \mathbb{E} \left[ \nabla f_i \left( \mathbf{w}^{t-\tau_i(t)}; \xi_i^{t-\rho_i(t)} \right) \mid \mathcal{F}_{t-\tau_i(t)} \right] = \nabla F_i \left( \mathbf{w}^{t-\tau_i(t)} \right),$$

where the last equality follows from the conditional unbiasedness assumption (Assumption 3) and the fact that  $\xi_i^{t-\rho_i(t)}$  is sampled independently of  $\mathcal{F}_{t-\tau_i(t)}$ .

### 2 Technical Lemmas

**Lemma S.1.** *Suppose that Assumptions 3 and 4 hold. Then, it holds for all  $t \geq 1$  that*

$$\mathbb{E} \left\| \frac{1}{n} \sum_{i=1}^n \left( \nabla f_i \left( \mathbf{w}^{t-\tau_i(t)}; \xi_i^{t-\rho_i(t)} \right) - \nabla F_i \left( \mathbf{w}^{t-\tau_i(t)} \right) \right) \right\|_2^2 \leq \frac{\sigma^2}{n}.$$

*Proof.* Expanding the squared norm gives

$$\begin{aligned} & \mathbb{E} \left\| \frac{1}{n} \sum_{i=1}^n \left( \nabla f_i \left( \mathbf{w}^{t-\tau_i(t)}; \xi_i^{t-\rho_i(t)} \right) - \nabla F_i \left( \mathbf{w}^{t-\tau_i(t)} \right) \right) \right\|_2^2 \\ &= \frac{1}{n^2} \sum_{i=1}^n \mathbb{E} \left\| \nabla f_i \left( \mathbf{w}^{t-\tau_i(t)}; \xi_i^{t-\rho_i(t)} \right) - \nabla F_i \left( \mathbf{w}^{t-\tau_i(t)} \right) \right\|_2^2 \\ &+ \frac{1}{n^2} \sum_{i \neq j} \underbrace{\mathbb{E} \left\langle \nabla f_i \left( \mathbf{w}^{t-\tau_i(t)}; \xi_i^{t-\rho_i(t)} \right) - \nabla F_i \left( \mathbf{w}^{t-\tau_i(t)} \right), \nabla f_j \left( \mathbf{w}^{t-\tau_j(t)}; \xi_j^{t-\rho_j(t)} \right) - \nabla F_j \left( \mathbf{w}^{t-\tau_j(t)} \right) \right\rangle}_{Y_{ij}} \end{aligned} \quad (\text{S.1})$$

To simplify  $Y_{ij}$  for  $i, j \in [n]$  such that  $i \neq j$ , we assume without loss of generality that  $\rho_i(t) \geq \rho_j(t)$ . Then  $t - \tau_i(t) \leq t - \rho_j(t)$  and thus  $\xi_j^{t-\rho_j(t)}$  is independent of  $\mathbf{w}^{t-\tau_i(t)}$ . Hence, using the law of total expectation and Assumption 3, we have

$$\begin{aligned}
Y_{ij} &= \mathbb{E} \left\langle \nabla f_i(\mathbf{w}^{t-\tau_i(t)}; \xi_i^{t-\rho_i(t)}) - \nabla F_i(\mathbf{w}^{t-\tau_i(t)}), \nabla f_j(\mathbf{w}^{t-\tau_j(t)}; \xi_j^{t-\rho_j(t)}) - \nabla F_j(\mathbf{w}^{t-\tau_j(t)}) \right\rangle \\
&= \mathbb{E} \left[ \mathbb{E}_{\xi_j^{t-\rho_j(t)}} \left\langle \nabla f_i(\mathbf{w}^{t-\tau_i(t)}; \xi_i^{t-\rho_i(t)}) - \nabla F_i(\mathbf{w}^{t-\tau_i(t)}), \nabla f_j(\mathbf{w}^{t-\tau_j(t)}; \xi_j^{t-\rho_j(t)}) - \nabla F_j(\mathbf{w}^{t-\tau_j(t)}) \right\rangle \right] \\
&= \mathbb{E} \left[ \left\langle \nabla f_i(\mathbf{w}^{t-\tau_i(t)}; \xi_i^{t-\rho_i(t)}) - \nabla F_i(\mathbf{w}^{t-\tau_i(t)}), \mathbb{E}_{\xi_j^{t-\rho_j(t)}} \left[ \nabla f_j(\mathbf{w}^{t-\tau_j(t)}; \xi_j^{t-\rho_j(t)}) - \nabla F_j(\mathbf{w}^{t-\tau_j(t)}) \right] \right\rangle \right] \\
&= 0.
\end{aligned}$$

Substituting this into (S.1) gives

$$\begin{aligned}
& \mathbb{E} \left\| \frac{1}{n} \sum_{i=1}^n \left( \nabla f_i(\mathbf{w}^{t-\tau_i(t)}; \xi_i^{t-\rho_i(t)}) - \nabla F_i(\mathbf{w}^{t-\tau_i(t)}) \right) \right\|_2^2 \\
&= \frac{1}{n^2} \sum_{i=1}^n \mathbb{E} \left\| \nabla f_i(\mathbf{w}^{t-\tau_i(t)}; \xi_i^{t-\rho_i(t)}) - \nabla F_i(\mathbf{w}^{t-\tau_i(t)}) \right\|_2^2 \\
&= \frac{1}{n^2} \sum_{i=1}^n \mathbb{E} \left[ \mathbb{E} \left[ \left\| \nabla f_i(\mathbf{w}^{t-\tau_i(t)}; \xi_i^{t-\rho_i(t)}) - \nabla F_i(\mathbf{w}^{t-\tau_i(t)}) \right\|_2^2 \middle| \mathbf{w}^{t-\tau_i(t)} \right] \right] \\
&\leq \frac{\sigma^2}{n}. \tag{S.2}
\end{aligned}$$

where the inequality follows from Assumption 4.  $\square$

**Lemma S.2.** *Suppose that Assumptions 3 and 4 hold. Then, it holds for all  $i \in [n]$  and  $t \geq 1$  that*

$$\mathbb{E} \left\| \mathbf{w}^t - \mathbf{w}^{t-\tau_i(t)} \right\|_2^2 \leq 2\tau_{\max}^2 \eta^2 \frac{\sigma^2}{n} + 2\tau_{\max} \eta^2 \sum_{s=1+\lceil t-\tau_{\max} \rceil_+}^t \mathbb{E} \left\| \frac{1}{n} \sum_{j=1}^n \nabla F_j(\mathbf{w}^{s-\tau_j(s)}) \right\|_2^2.$$

In addition, we have

$$\mathbb{E} \left\| \mathbf{w}^t - \mathbf{w}^{\lceil t-\tau_{\max} \rceil_+} \right\|_2^2 \leq 2\tau_{\max}^2 \eta^2 \frac{\sigma^2}{n} + 2\tau_{\max} \eta^2 \sum_{s=1+\lceil t-\tau_{\max} \rceil_+}^t \mathbb{E} \left\| \frac{1}{n} \sum_{j=1}^n \nabla F_j(\mathbf{w}^{s-\tau_j(s)}) \right\|_2^2. \tag{S.3}$$

*Proof.* For all  $i \in [n]$  and  $t \geq 1$ , it follows from the telescoping sum  $\sum_{s=1+t-\tau_i(t)}^t (\mathbf{w}^s - \mathbf{w}^{s-1}) = \mathbf{w}^t - \mathbf{w}^{t-\tau_i(t)}$  and the iterative formula (3) that

$$\begin{aligned}
& \mathbb{E} \left\| \mathbf{w}^t - \mathbf{w}^{t-\tau_i(t)} \right\|_2^2 \\
&= \mathbb{E} \left\| \sum_{s=1+t-\tau_i(t)}^t (\mathbf{w}^s - \mathbf{w}^{s-1}) \right\|_2^2
\end{aligned}$$

$$\begin{aligned}
&= \mathbb{E} \left\| \sum_{s=1+t-\tau_i(t)}^t \eta \mathbf{g}^s \right\|_2^2 \\
&= \mathbb{E} \left\| \sum_{s=1+t-\tau_i(t)}^t \frac{\eta}{n} \sum_{j=1}^n \nabla f_j(\mathbf{w}^{s-\tau_j(s)}; \boldsymbol{\xi}_j^{s-\rho_j(s)}) \right\|_2^2 \\
&= \frac{\eta^2}{n^2} \mathbb{E} \left\| \sum_{s=1+t-\tau_i(t)}^t \sum_{j=1}^n \left( \nabla f_j(\mathbf{w}^{s-\tau_j(s)}; \boldsymbol{\xi}_j^{s-\rho_j(s)}) - \nabla F_j(\mathbf{w}^{s-\tau_j(s)}) + \nabla F_j(\mathbf{w}^{s-\tau_j(s)}) \right) \right\|_2^2. \tag{S.4}
\end{aligned}$$

Further applying the fact that  $\|\mathbf{x} + \mathbf{y}\|_2^2 \leq 2\|\mathbf{x}\|_2^2 + 2\|\mathbf{y}\|_2^2$  for vectors  $\mathbf{x}$  and  $\mathbf{y}$  to (S.4), we have

$$\begin{aligned}
\mathbb{E} \|\mathbf{w}^t - \mathbf{w}^{t-\tau_i(t)}\|_2^2 &\leq \frac{2\eta^2}{n^2} \mathbb{E} \underbrace{\left\| \sum_{s=1+t-\tau_i(t)}^t \sum_{j=1}^n \left( \nabla f_j(\mathbf{w}^{s-\tau_j(s)}; \boldsymbol{\xi}_j^{s-\rho_j(s)}) - \nabla F_j(\mathbf{w}^{s-\tau_j(s)}) \right) \right\|_2^2}_{\Phi_1} \\
&\quad + \frac{2\eta^2}{n^2} \mathbb{E} \underbrace{\left\| \sum_{s=1+t-\tau_i(t)}^t \sum_{j=1}^n \nabla F_j(\mathbf{w}^{s-\tau_j(s)}) \right\|_2^2}_{\Phi_2}. \tag{S.5}
\end{aligned}$$

Subsequently, we upper bound  $\Phi_1$  and  $\Phi_2$ , respectively. Expanding  $\Phi_1$ , we have

$$\begin{aligned}
\Phi_1 &= \sum_{s=1+t-\tau_i(t)}^t \mathbb{E} \left\| \sum_{j=1}^n \left( \nabla f_j(\mathbf{w}^{s-\tau_j(s)}; \boldsymbol{\xi}_j^{s-\rho_j(s)}) - \nabla F_j(\mathbf{w}^{s-\tau_j(s)}) \right) \right\|_2^2 \\
&\quad + \sum_{\substack{s, s': s \neq s', \\ 1+t-\tau_i(t) \leq s, s' \leq t}} \mathbb{E} \left\langle \sum_{j=1}^n \left( \nabla f_j(\mathbf{w}^{s-\tau_j(s)}; \boldsymbol{\xi}_j^{s-\rho_j(s)}) - \nabla F_j(\mathbf{w}^{s-\tau_j(s)}) \right), \right. \\
&\quad \left. \sum_{j=1}^n \left( \nabla f_j(\mathbf{w}^{s'-\tau_j(s')}; \boldsymbol{\xi}_j^{s'-\rho_j(s')} ) - \nabla F_j(\mathbf{w}^{s'-\tau_j(s')}) \right) \right\rangle. \tag{S.6}
\end{aligned}$$

For the inner product terms in (S.6), denoted by  $Z^{ss'}$  for  $s, s' \in [1+t-\tau_i(t), t]$  and  $s \neq s'$ , note that

$$\begin{aligned}
Z^{ss'} &= \mathbb{E} \left\langle \sum_{j=1}^n \left( \nabla f_j(\mathbf{w}^{s-\tau_j(s)}; \boldsymbol{\xi}_j^{s-\rho_j(s)}) - \nabla F_j(\mathbf{w}^{s-\tau_j(s)}) \right), \sum_{j=1}^n \left( \nabla f_j(\mathbf{w}^{s'-\tau_j(s')}; \boldsymbol{\xi}_j^{s'-\rho_j(s')} ) - \nabla F_j(\mathbf{w}^{s'-\tau_j(s')}) \right) \right\rangle \\
&= \mathbb{E} \left[ \sum_{i=1}^n \sum_{j=1}^n \left\langle \nabla f_i(\mathbf{w}^{s-\tau_i(s)}; \boldsymbol{\xi}_i^{s-\rho_i(s)}) - \nabla F_i(\mathbf{w}^{s-\tau_i(s)}), \nabla f_j(\mathbf{w}^{s'-\tau_j(s')}; \boldsymbol{\xi}_j^{s'-\rho_j(s')} ) - \nabla F_j(\mathbf{w}^{s'-\tau_j(s')}) \right\rangle \right] \\
&= \sum_{i=1}^n \sum_{j=1}^n \mathbb{E} \left\langle \nabla f_i(\mathbf{w}^{s-\tau_i(s)}; \boldsymbol{\xi}_i^{s-\rho_i(s)}) - \nabla F_i(\mathbf{w}^{s-\tau_i(s)}), \nabla f_j(\mathbf{w}^{s'-\tau_j(s')}; \boldsymbol{\xi}_j^{s'-\rho_j(s')} ) - \nabla F_j(\mathbf{w}^{s'-\tau_j(s')}) \right\rangle
\end{aligned}$$

$$\begin{aligned}
&= \sum_{j=1}^n \mathbb{E} \left\langle \nabla f_j(\mathbf{w}^{s-\tau_j(s)}; \boldsymbol{\xi}_j^{s-\rho_j(s)}) - \nabla F_j(\mathbf{w}^{s-\tau_j(s)}), \nabla f_j(\mathbf{w}^{s'-\tau_j(s')}; \boldsymbol{\xi}_j^{s'-\rho_j(s')}) - \nabla F_j(\mathbf{w}^{s'-\tau_j(s')}) \right\rangle \\
&\quad + \sum_{i,j:i \neq j} \mathbb{E} \left\langle \nabla f_i(\mathbf{w}^{s-\tau_i(s)}; \boldsymbol{\xi}_i^{s-\rho_i(s)}) - \nabla F_i(\mathbf{w}^{s-\tau_i(s)}), \nabla f_j(\mathbf{w}^{s'-\tau_j(s')}; \boldsymbol{\xi}_j^{s'-\rho_j(s')}) - \nabla F_j(\mathbf{w}^{s'-\tau_j(s')}) \right\rangle.
\end{aligned}$$

To simplify the inner product terms in the last line of the above equality, denoted by  $Z_{ij}^{ss'}$  for all  $i, j \in [n]$  and  $i \neq j$ , we assume without loss of generality that  $s - \rho_i(s) > s' - \rho_j(s')$ , which implies that  $\boldsymbol{\xi}_i^{s-\rho_i(s)}$  is sampled after  $\boldsymbol{\xi}_j^{s'-\rho_j(s')}$ . Additionally, since  $\rho_j(s') \leq \tau_j(s')$  by (5), we have  $s - \rho_i(s) > s' - \tau_j(s')$ . Thus,  $\boldsymbol{\xi}_i^{s-\rho_i(s)}$  is independent of  $\mathbf{w}^{s'-\tau_j(s')}$ . Further using the law of total expectation and Assumption 3, we have

$$\begin{aligned}
Z_{ij}^{ss'} &= \mathbb{E} \left[ \mathbb{E}_{\boldsymbol{\xi}_i^{s-\rho_i(s)}} \left\langle \nabla f_i(\mathbf{w}^{s-\tau_i(s)}; \boldsymbol{\xi}_i^{s-\rho_i(s)}) - \nabla F_i(\mathbf{w}^{s-\tau_i(s)}), \nabla f_j(\mathbf{w}^{s'-\tau_j(s')}; \boldsymbol{\xi}_j^{s'-\rho_j(s')}) - \nabla F_j(\mathbf{w}^{s'-\tau_j(s')}) \right\rangle \right] \\
&= \mathbb{E} \left[ \left\langle \mathbb{E}_{\boldsymbol{\xi}_i^{s-\rho_i(s)}} \left[ \nabla f_i(\mathbf{w}^{s-\tau_i(s)}; \boldsymbol{\xi}_i^{s-\rho_i(s)}) - \nabla F_i(\mathbf{w}^{s-\tau_i(s)}) \right], \nabla f_j(\mathbf{w}^{s'-\tau_j(s')}; \boldsymbol{\xi}_j^{s'-\rho_j(s')}) - \nabla F_j(\mathbf{w}^{s'-\tau_j(s')}) \right\rangle \right] \\
&= 0
\end{aligned}$$

Substituting this into  $Z^{ss'}$  and using Assumption 4, we have

$$\begin{aligned}
Z^{ss'} &= \sum_{j=1}^n \mathbb{E} \left\langle \nabla f_j(\mathbf{w}^{s-\tau_j(s)}; \boldsymbol{\xi}_j^{s-\rho_j(s)}) - \nabla F_j(\mathbf{w}^{s-\tau_j(s)}), \nabla f_j(\mathbf{w}^{s'-\tau_j(s')}; \boldsymbol{\xi}_j^{s'-\rho_j(s')}) - \nabla F_j(\mathbf{w}^{s'-\tau_j(s')}) \right\rangle \\
&\leq \frac{1}{2} \sum_{j=1}^n \mathbb{E} \|\nabla f_j(\mathbf{w}^{s-\tau_j(s)}; \boldsymbol{\xi}_j^{s-\rho_j(s)}) - \nabla F_j(\mathbf{w}^{s-\tau_j(s)})\|_2^2 \\
&\quad + \frac{1}{2} \sum_{j=1}^n \mathbb{E} \|\nabla f_j(\mathbf{w}^{s'-\tau_j(s')}; \boldsymbol{\xi}_j^{s'-\rho_j(s')}) - \nabla F_j(\mathbf{w}^{s'-\tau_j(s')})\|_2^2 \\
&\leq n\sigma^2.
\end{aligned}$$

Plugging this back into (S.6) and using Lemma S.1 yield

$$\begin{aligned}
\Phi_1 &\leq \sum_{s=1+t-\tau_i(t)}^t n\sigma^2 + \sum_{\substack{s,s':s \neq s', \\ 1+t-\tau_i(t) \leq s,s' \leq t}} n\sigma^2 \\
&= \tau_i(t)n\sigma^2 + (\tau_i(t)^2 - \tau_i(t))n\sigma^2 \\
&= \tau_i(t)^2 n\sigma^2 \\
&\leq n\tau_{\max}^2 \sigma^2.
\end{aligned} \tag{S.7}$$

To upper bound  $\Phi_2$ , we use the fact that  $\|\sum_{i=1}^m \mathbf{x}_i\|_2^2 \leq m \sum_{i=1}^m \|\mathbf{x}_i\|_2^2$  for vectors  $\mathbf{x}_1, \dots, \mathbf{x}_m$ , then

$$\Phi_2 = \mathbb{E} \left\| \sum_{s=1+t-\tau_i(t)}^t \sum_{j=1}^n \nabla F_j(\mathbf{w}^{s-\tau_j(s)}) \right\|_2^2$$

$$\begin{aligned}
&\leq \tau_i(t) \sum_{s=1+t-\tau_i(t)}^t \mathbb{E} \left\| \sum_{j=1}^n \nabla F_j(\mathbf{w}^{s-\tau_j(s)}) \right\|_2^2 \\
&\leq \tau_{\max} \sum_{s=1+[t-\tau_{\max}]_+}^t \mathbb{E} \left\| \sum_{j=1}^n \nabla F_j(\mathbf{w}^{s-\tau_j(s)}) \right\|_2^2.
\end{aligned} \tag{S.8}$$

Substituting (S.7) and (S.8) back into (S.5) gives the desired result. Additionally, (S.3) can be proved in a similar manner.  $\square$

**Lemma S.3.** *Suppose that Assumptions 2–4 hold. Then, it holds for all  $i \in [n]$  and  $t \geq 1$  that*

$$\mathbb{E} \|\mathbf{g}^t\|_2^2 \leq \left(2 + 8L^2\tau_{\max}^2\eta^2\right) \frac{\sigma^2}{n} + 4\mathbb{E} \|\nabla F(\mathbf{w}^{t-1})\|_2^2 + 8L^2\tau_{\max}\eta^2 \sum_{s=1+[t-\tau_{\max}]_+}^t \mathbb{E} \left\| \frac{1}{n} \sum_{j=1}^n \nabla F_j(\mathbf{w}^{s-\tau_j(s)}) \right\|_2^2.$$

*Proof.* Following the fact that  $\|\mathbf{x} + \mathbf{y}\|_2^2 \leq 2\|\mathbf{x}\|_2^2 + 2\|\mathbf{y}\|_2^2$  for vectors  $\mathbf{x}$  and  $\mathbf{y}$ , we have

$$\begin{aligned}
\mathbb{E} \|\mathbf{g}^t\|_2^2 &= \mathbb{E} \left\| \frac{1}{n} \sum_{i=1}^n \nabla f_i(\mathbf{w}^{t-\tau_i(t)}; \boldsymbol{\xi}_i^{t-\rho_i(t)}) \right\|_2^2 \\
&= \mathbb{E} \left\| \frac{1}{n} \sum_{i=1}^n \left( \nabla f_i(\mathbf{w}^{t-\tau_i(t)}; \boldsymbol{\xi}_i^{t-\rho_i(t)}) - \nabla F_i(\mathbf{w}^{t-\tau_i(t)}) \right) + \frac{1}{n} \sum_{i=1}^n \nabla F_i(\mathbf{w}^{t-\tau_i(t)}) \right\|_2^2 \\
&\leq 2\mathbb{E} \left\| \frac{1}{n} \sum_{i=1}^n \left( \nabla f_i(\mathbf{w}^{t-\tau_i(t)}; \boldsymbol{\xi}_i^{t-\rho_i(t)}) - \nabla F_i(\mathbf{w}^{t-\tau_i(t)}) \right) \right\|_2^2 + 2\mathbb{E} \left\| \frac{1}{n} \sum_{i=1}^n \nabla F_i(\mathbf{w}^{t-\tau_i(t)}) \right\|_2^2 \\
&\leq \frac{2\sigma^2}{n} + 2 \underbrace{\mathbb{E} \left\| \frac{1}{n} \sum_{i=1}^n \nabla F_i(\mathbf{w}^{t-\tau_i(t)}) \right\|_2^2}_{\Psi}.
\end{aligned} \tag{S.9}$$

where the last inequality holds due to Lemma S.1. It suffices to upper bound  $\Psi$ . We observe that

$$\begin{aligned}
\Psi &\leq 2\mathbb{E} \left\| \frac{1}{n} \sum_{i=1}^n \left( \nabla F_i(\mathbf{w}^{t-\tau_i(t)}) - \nabla F_i(\mathbf{w}^{t-1}) \right) \right\|_2^2 + 2\mathbb{E} \left\| \frac{1}{n} \sum_{i=1}^n \nabla F_i(\mathbf{w}^{t-1}) \right\|_2^2 \\
&\leq \frac{2L^2}{n} \sum_{i=1}^n \mathbb{E} \|\mathbf{w}^{t-\tau_i(t)} - \mathbf{w}^{t-1}\|_2^2 + 2\mathbb{E} \|\nabla F(\mathbf{w}^{t-1})\|_2^2, \\
&\leq \frac{4\sigma^2}{n} L^2\tau_{\max}^2\eta^2 + 4L^2\tau_{\max}\eta^2 \sum_{s=1+[t-\tau_{\max}]_+}^t \mathbb{E} \left\| \frac{1}{n} \sum_{j=1}^n \nabla F_j(\mathbf{w}^{s-\tau_j(s)}) \right\|_2^2 + 2\mathbb{E} \|\nabla F(\mathbf{w}^{t-1})\|_2^2,
\end{aligned} \tag{S.10}$$

where the second inequality uses the fact that  $\|\sum_{i=1}^m \mathbf{x}_i\|_2^2 \leq m \sum_{i=1}^m \|\mathbf{x}_i\|_2^2$  for vectors  $\mathbf{x}_1, \dots, \mathbf{x}_m$  and Assumption 2, and the last inequality follows from Lemma S.2. Finally, plugging (S.10) back into (S.9)

gives the desired result.  $\square$

### 3 Proof of Proposition 1

*Proof.* We first decompose the inner product into two terms:

$$\mathbb{E}\langle \nabla F(\mathbf{w}^{t-1}), \mathbf{g}^t \rangle = \underbrace{\mathbb{E}\langle \nabla F(\mathbf{w}^{\lceil t-\tau_{\max} \rceil_+}), \mathbf{g}^t \rangle}_A + \underbrace{\mathbb{E}\langle \nabla F(\mathbf{w}^{t-1}) - \nabla F(\mathbf{w}^{\lceil t-\tau_{\max} \rceil_+}), \mathbf{g}^t \rangle}_B. \quad (\text{S.11})$$

Subsequently, we lower bound  $A$  and  $B$ , respectively. Since  $\rho_i(t) \leq \tau_i(t) \leq \tau_{\max}$  for all  $i \in [n]$ , then  $t - \rho_i(t) \geq t - \tau_{\max}$  for all  $i \in [n]$ , which implies that  $\xi_1^{t-\rho_1(t)}, \dots, \xi_n^{t-\rho_n(t)}$  are independent of  $\mathbf{w}^{\lceil t-\tau_{\max} \rceil_+}$ . Then, we have

$$\begin{aligned} A &= \mathbb{E} \left[ \langle \nabla F(\mathbf{w}^{\lceil t-\tau_{\max} \rceil_+}), \mathbf{g}^t \rangle \right] \stackrel{(a)}{=} \mathbb{E} \left[ \mathbb{E}_{\xi_1^{t-\rho_1(t)}, \dots, \xi_n^{t-\rho_n(t)}} \left[ \langle \nabla F(\mathbf{w}^{\lceil t-\tau_{\max} \rceil_+}), \mathbf{g}^t \rangle \right] \right] \\ &= \mathbb{E} \left\langle \nabla F(\mathbf{w}^{\lceil t-\tau_{\max} \rceil_+}), \mathbb{E}_{\xi_i^{t-\rho_i(t)}} \left[ \frac{1}{n} \sum_{i=1}^n \nabla f_i(\mathbf{w}^{t-\tau_i(t)}, \xi_i^{t-\rho_i(t)}) \right] \right\rangle \\ &\stackrel{(b)}{=} \mathbb{E} \left\langle \nabla F(\mathbf{w}^{\lceil t-\tau_{\max} \rceil_+}), \frac{1}{n} \sum_{i=1}^n \nabla F_i(\mathbf{w}^{t-\tau_i(t)}) \right\rangle \\ &= \underbrace{\mathbb{E} \left\langle \nabla F(\mathbf{w}^{\lceil t-\tau_{\max} \rceil_+}) - \nabla F(\mathbf{w}^{t-1}), \frac{1}{n} \sum_{i=1}^n \nabla F_i(\mathbf{w}^{t-\tau_i(t)}) \right\rangle}_{A_1} + \underbrace{\mathbb{E} \left\langle \nabla F(\mathbf{w}^{t-1}), \frac{1}{n} \sum_{i=1}^n \nabla F_i(\mathbf{w}^{t-\tau_i(t)}) \right\rangle}_{A_2}, \quad (\text{S.12}) \end{aligned}$$

where (a) uses the law of total expectation, and (b) holds due to Assumption 3. Then, we lower bound  $A_1$  as follows:

$$\begin{aligned} A_1 &= \mathbb{E} \left\langle \nabla F(\mathbf{w}^{\lceil t-\tau_{\max} \rceil_+}) - \nabla F(\mathbf{w}^{t-1}), \frac{1}{n} \sum_{i=1}^n \left( \nabla F_i(\mathbf{w}^{t-\tau_i(t)}) - \nabla F_i(\mathbf{w}^{t-1}) \right) \right\rangle \\ &\quad + \mathbb{E} \langle \nabla F(\mathbf{w}^{\lceil t-\tau_{\max} \rceil_+}) - \nabla F(\mathbf{w}^{t-1}), \nabla F(\mathbf{w}^{t-1}) \rangle \\ &\geq -\frac{1}{2} \mathbb{E} \|\nabla F(\mathbf{w}^{\lceil t-\tau_{\max} \rceil_+}) - \nabla F(\mathbf{w}^{t-1})\|_2^2 - \frac{1}{2} \mathbb{E} \left\| \frac{1}{n} \sum_{i=1}^n \left( \nabla F_i(\mathbf{w}^{t-\tau_i(t)}) - \nabla F_i(\mathbf{w}^{t-1}) \right) \right\|_2^2 \\ &\quad - \mathbb{E} \|\nabla F(\mathbf{w}^{\lceil t-\tau_{\max} \rceil_+}) - \nabla F(\mathbf{w}^{t-1})\|_2^2 - \frac{1}{4} \mathbb{E} \|\nabla F(\mathbf{w}^{t-1})\|_2^2 \\ &= -\frac{1}{4} \mathbb{E} \|\nabla F(\mathbf{w}^{t-1})\|_2^2 - \frac{3}{2} \mathbb{E} \|\nabla F(\mathbf{w}^{\lceil t-\tau_{\max} \rceil_+}) - \nabla F(\mathbf{w}^{t-1})\|_2^2 - \frac{1}{2} \mathbb{E} \left\| \frac{1}{n} \sum_{i=1}^n \left( \nabla F_i(\mathbf{w}^{t-\tau_i(t)}) - \nabla F_i(\mathbf{w}^{t-1}) \right) \right\|_2^2, \quad (\text{S.13}) \end{aligned}$$

where the inequality uses the fact that  $\langle \mathbf{x}, \mathbf{y} \rangle \geq -\frac{1}{2}\|\mathbf{x}\|_2^2 - \frac{1}{2}\|\mathbf{y}\|_2^2$  and  $\langle \mathbf{x}, \mathbf{y} \rangle \geq -\|\mathbf{x}\|_2^2 - \frac{1}{4}\|\mathbf{y}\|_2^2$  for vectors  $\mathbf{x}$  and  $\mathbf{y}$ . Using the identity  $\langle \mathbf{x}, \mathbf{y} \rangle = \frac{1}{2}\|\mathbf{x}\|_2^2 + \frac{1}{2}\|\mathbf{y}\|_2^2 - \frac{1}{2}\|\mathbf{x} - \mathbf{y}\|_2^2$  for vectors  $\mathbf{x}$  and  $\mathbf{y}$ , we have

$$A_2 = \frac{1}{2}\mathbb{E}\|\nabla F(\mathbf{w}^{t-1})\|_2^2 + \frac{1}{2}\mathbb{E}\left\|\frac{1}{n}\sum_{i=1}^n \nabla F_i(\mathbf{w}^{t-\tau_i(t)})\right\|_2^2 - \frac{1}{2}\mathbb{E}\left\|\nabla F(\mathbf{w}^{t-1}) - \frac{1}{n}\sum_{i=1}^n \nabla F_i(\mathbf{w}^{t-\tau_i(t)})\right\|_2^2. \quad (\text{S.14})$$

Substituting (S.13) and (S.14) back to (S.12) gives

$$\begin{aligned} A &\geq \frac{1}{4}\mathbb{E}\|\nabla F(\mathbf{w}^{t-1})\|_2^2 - \frac{3}{2}\mathbb{E}\|\nabla F(\mathbf{w}^{t-1}) - \nabla F(\mathbf{w}^{[t-\tau_{\max}]_+})\|_2^2 \\ &\quad - \mathbb{E}\left\|\frac{1}{n}\sum_{i=1}^n \left(\nabla F_i(\mathbf{w}^{t-1}) - \nabla F_i(\mathbf{w}^{t-\tau_i(t)})\right)\right\|_2^2 + \frac{1}{2}\mathbb{E}\left\|\frac{1}{n}\sum_{i=1}^n \nabla F_i(\mathbf{w}^{t-\tau_i(t)})\right\|_2^2 \\ &\stackrel{(a)}{\geq} \frac{1}{4}\mathbb{E}\|\nabla F(\mathbf{w}^{t-1})\|_2^2 - \frac{3L^2}{2}\mathbb{E}\|\mathbf{w}^t - \mathbf{w}^{[t-\tau_{\max}]_+}\|_2^2 \\ &\quad - \frac{L^2}{n}\sum_{i=1}^n \mathbb{E}\|\mathbf{w}^t - \mathbf{w}^{t-\tau_i(t)}\|_2^2 + \frac{1}{2}\mathbb{E}\left\|\frac{1}{n}\sum_{i=1}^n \nabla F_i(\mathbf{w}^{t-\tau_i(t)})\right\|_2^2, \\ &\stackrel{(b)}{\geq} \frac{1}{4}\mathbb{E}\|\nabla F(\mathbf{w}^{t-1})\|_2^2 - 5L^2\tau_{\max}^2\eta^2\frac{\sigma^2}{n} + \frac{1}{2}\mathbb{E}\left\|\frac{1}{n}\sum_{i=1}^n \nabla F_i(\mathbf{w}^{t-\tau_i(t)})\right\|_2^2 \\ &\quad - 5L^2\tau_{\max}\eta^2\sum_{s=1+[t-\tau_{\max}]_+}^t \mathbb{E}\left\|\frac{1}{n}\sum_{j=1}^n \nabla F_j(\mathbf{w}^{s-\tau_j(s)})\right\|_2^2, \end{aligned} \quad (\text{S.15})$$

where (a) uses Assumption 2 and (b) uses Lemma S.2. To lower bound  $B$ , we observe that

$$\begin{aligned} B &= \mathbb{E}\langle \nabla F(\mathbf{w}^{t-1}) - \nabla F(\mathbf{w}^{[t-\tau_{\max}]_+}), \mathbf{g}^t \rangle \\ &\stackrel{(a)}{\geq} -\mathbb{E}\left[\|\nabla F(\mathbf{w}^{t-1}) - \nabla F(\mathbf{w}^{[t-\tau_{\max}]_+})\|_2\|\mathbf{g}^t\|_2\right] \\ &\stackrel{(b)}{\geq} -L\mathbb{E}\left[\|\mathbf{w}^t - \mathbf{w}^{[t-\tau_{\max}]_+}\|_2\|\mathbf{g}^t\|_2\right] \\ &\stackrel{(c)}{=} -L\mathbb{E}\left[\left\|\sum_{s=1+[t-\tau_{\max}]_+}^t \eta\mathbf{g}^s\right\|_2\|\mathbf{g}^t\|_2\right] \\ &\stackrel{(d)}{\geq} -L\mathbb{E}\left[\sum_{s=1+[t-\tau_{\max}]_+}^t \eta\|\mathbf{g}^s\|_2\|\mathbf{g}^t\|_2\right] \\ &\stackrel{(e)}{\geq} -L\eta\sum_{s=1+[t-\tau_{\max}]_+}^t \frac{1}{2}\left(\mathbb{E}\|\mathbf{g}^s\|_2^2 + \mathbb{E}\|\mathbf{g}^t\|_2^2\right) \\ &= -\frac{L\eta}{2}\sum_{s=1+[t-\tau_{\max}]_+}^t \mathbb{E}\|\mathbf{g}^s\|_2^2 - \frac{L\eta}{2}\tau_{\max}\mathbb{E}\|\mathbf{g}^t\|_2^2, \end{aligned} \quad (\text{S.16})$$

where (a) follows from the Cauchy-Schwarz inequality, (b) follows from Assumption 2, (c) uses the telescoping sum

$$\mathbf{w}^t - \mathbf{w}^{[t-\tau_{\max}]_+} = \sum_{s=1+[t-\tau_{\max}]_+}^t (\mathbf{w}^s - \mathbf{w}^{s-1}) = \sum_{s=1+[t-\tau_{\max}]_+}^t \eta \mathbf{g}^s,$$

(d) uses the triangle inequality and (e) is due to the Young's inequality. Applying Lemma S.3 to (S.16) and simplifying, we have

$$\begin{aligned} B &\geq - (2L\tau_{\max}\eta + 8L^3\tau_{\max}^3\eta^3) \frac{\sigma^2}{n} - 2L\eta \sum_{s=1+[t-\tau_{\max}]_+}^t \mathbb{E} \|\nabla F(\mathbf{w}^{s-1})\|_2^2 \\ &\quad - 2L\tau_{\max}\eta \mathbb{E} \|\nabla F(\mathbf{w}^{t-1})\|_2^2 - 4L^3\tau_{\max}^2\eta^3 \sum_{s=1+[t-\tau_{\max}]_+}^t \mathbb{E} \left\| \frac{1}{n} \sum_{j=1}^n \nabla F_j(\mathbf{w}^{s-\tau_j(s)}) \right\|_2^2 \\ &\quad - 4L^3\tau_{\max}^2\eta^3 \sum_{s=1+[t-\tau_{\max}]_+}^t \sum_{s'=1+[s-\tau_{\max}]_+}^s \mathbb{E} \left\| \frac{1}{n} \sum_{j=1}^n \nabla F_j(\mathbf{w}^{s'-\tau_j(s')}) \right\|_2^2 \end{aligned}$$

Further using the fact that  $\sum_{s=1+[t-K]_+}^t \sum_{s'=1+[s-K]_+}^s a_{s'} \leq K \sum_{s=1+[t-2K]_+}^t a_s$  for  $a_1, \dots, a_t \geq 0$  and  $K \geq 1$ , we have

$$\begin{aligned} B &\geq - (2L\tau_{\max}\eta + 8L^3\tau_{\max}^3\eta^3) \frac{\sigma^2}{n} - 2L\eta \sum_{s=1+[t-\tau_{\max}]_+}^t \mathbb{E} \|\nabla F(\mathbf{w}^{s-1})\|_2^2 \\ &\quad - 2L\tau_{\max}\eta \mathbb{E} \|\nabla F(\mathbf{w}^{t-1})\|_2^2 - 8L^3\tau_{\max}^2\eta^3 \sum_{s=1+[t-2\tau_{\max}]_+}^t \mathbb{E} \left\| \frac{1}{n} \sum_{j=1}^n \nabla F_j(\mathbf{w}^{s-\tau_j(s)}) \right\|_2^2. \end{aligned} \quad (\text{S.17})$$

Substituting (S.15) and (S.17) into (S.11) and simplifying, we have

$$\begin{aligned} \mathbb{E} \langle \nabla F(\mathbf{w}^{t-1}), \mathbf{g}^t \rangle &\geq \left( \frac{1}{4} - 2L\tau_{\max}\eta \right) \mathbb{E} \|\nabla F(\mathbf{w}^{t-1})\|_2^2 - 2L\eta \sum_{s=1+[t-\tau_{\max}]_+}^t \mathbb{E} \|\nabla F(\mathbf{w}^{s-1})\|_2^2 \\ &\quad - (2L\tau_{\max}\eta + 5L^2\tau_{\max}^2\eta^2 + 8L^3\tau_{\max}^3\eta^3) \frac{\sigma^2}{n} + \frac{1}{2} \mathbb{E} \left\| \frac{1}{n} \sum_{i=1}^n \nabla F_i(\mathbf{w}^{t-\tau_i(t)}) \right\|_2^2 \\ &\quad - (5L^2\tau_{\max}\eta^2 + 8L^3\tau_{\max}^2\eta^3) \sum_{s=1+[t-2\tau_{\max}]_+}^t \mathbb{E} \left\| \frac{1}{n} \sum_{j=1}^n \nabla F_j(\mathbf{w}^{s-\tau_j(s)}) \right\|_2^2 \\ &\geq \frac{1}{8} \mathbb{E} \|\nabla F(\mathbf{w}^{t-1})\|_2^2 - 2L\eta \sum_{s=1+[t-\tau_{\max}]_+}^t \mathbb{E} \|\nabla F(\mathbf{w}^{s-1})\|_2^2 - 3L\tau_{\max}\eta \frac{\sigma^2}{n} \\ &\quad + \frac{1}{2} \mathbb{E} \left\| \frac{1}{n} \sum_{i=1}^n \nabla F_i(\mathbf{w}^{t-\tau_i(t)}) \right\|_2^2 - 6L^2\tau_{\max}\eta^2 \sum_{s=1+[t-2\tau_{\max}]_+}^t \mathbb{E} \left\| \frac{1}{n} \sum_{j=1}^n \nabla F_j(\mathbf{w}^{s-\tau_j(s)}) \right\|_2^2, \end{aligned}$$

where the last inequality holds because the stepsize condition  $\eta \leq 1/(16L\tau_{\max})$  implies that

$$\begin{aligned} \frac{1}{4} - 2L\tau_{\max}\eta &\geq \frac{1}{8}, \\ 2L\tau_{\max}\eta + 5L^2\tau_{\max}^2\eta^2 + 8L^3\tau_{\max}^3\eta^3 &\leq 2L\tau_{\max}\eta + 6L^2\tau_{\max}^2\eta^2 \leq 3L\tau_{\max}\eta, \\ 5L^2\tau_{\max}\eta^2 + 8L^3\tau_{\max}^2\eta^3 &\leq 6L^2\tau_{\max}\eta^2. \end{aligned}$$

This completes the proof.  $\square$

## 4 Proof of Theorem 1

*Proof.* Since  $F$  is  $L$ -smooth, it follows from the descent lemma that

$$\begin{aligned} \mathbb{E}[F(\mathbf{w}^t)] - \mathbb{E}[F(\mathbf{w}^{t-1})] &\leq \mathbb{E}[\langle \nabla F(\mathbf{w}^{t-1}), \mathbf{w}^t - \mathbf{w}^{t-1} \rangle] + \frac{L}{2} \mathbb{E} \|\mathbf{w}^t - \mathbf{w}^{t-1}\|_2^2 \\ &= -\eta \mathbb{E} \langle \nabla F(\mathbf{w}^{t-1}), \mathbf{g}^t \rangle + \frac{L\eta^2}{2} \mathbb{E} \|\mathbf{g}^t\|_2^2. \end{aligned} \quad (\text{S.18})$$

Substituting Lemma S.3 and Proposition 1 into (S.18), we obtain

$$\begin{aligned} &\mathbb{E}[F(\mathbf{w}^t)] - \mathbb{E}[F(\mathbf{w}^{t-1})] \\ &\leq -\frac{1}{8}\eta \mathbb{E} \|\nabla F(\mathbf{w}^{t-1})\|_2^2 + 2L\eta^2 \sum_{s=1+[t-\tau_{\max}]_+}^t \mathbb{E} \|\nabla F(\mathbf{w}^{s-1})\|_2^2 + 3L\tau_{\max}\eta^2 \frac{\sigma^2}{n} \\ &\quad - \frac{1}{2}\eta \mathbb{E} \left\| \frac{1}{n} \sum_{i=1}^n \nabla F_i(\mathbf{w}^{t-\tau_i(t)}) \right\|_2^2 + 6L^2\tau_{\max}\eta^3 \sum_{s=1+[t-2\tau_{\max}]_+}^t \mathbb{E} \left\| \frac{1}{n} \sum_{j=1}^n \nabla F_j(\mathbf{w}^{s-\tau_j(s)}) \right\|_2^2 \\ &\quad + \left( L\eta^2 + 4L^3\tau_{\max}^2\eta^4 \right) \frac{\sigma^2}{n} + 4L^3\tau_{\max}\eta^4 \sum_{s=1+[t-\tau_{\max}]_+}^t \mathbb{E} \left\| \frac{1}{n} \sum_{j=1}^n \nabla F_j(\mathbf{w}^{s-\tau_j(s)}) \right\|_2^2 \\ &\quad + 2L\eta^2 \mathbb{E} \|\nabla F(\mathbf{w}^{t-1})\|_2^2 \\ &\leq -\left( \frac{1}{8}\eta - 2L\eta^2 \right) \mathbb{E} \|\nabla F(\mathbf{w}^{t-1})\|_2^2 + 2L\eta^2 \sum_{s=1+[t-\tau_{\max}]_+}^t \mathbb{E} \|\nabla F(\mathbf{w}^{s-1})\|_2^2 \\ &\quad + (L\eta^2 + 3L\tau_{\max}\eta^2 + 4L^3\tau_{\max}^2\eta^4) \frac{\sigma^2}{n} - \frac{1}{2}\eta \mathbb{E} \left\| \frac{1}{n} \sum_{i=1}^n \nabla F_i(\mathbf{w}^{t-\tau_i(t)}) \right\|_2^2 \\ &\quad + (6L^2\tau_{\max}\eta^3 + 4L^3\tau_{\max}\eta^4) \sum_{s=1+[t-2\tau_{\max}]_+}^t \mathbb{E} \left\| \frac{1}{n} \sum_{j=1}^n \nabla F_j(\mathbf{w}^{s-\tau_j(s)}) \right\|_2^2 \\ &\leq -\frac{1}{16}\eta \mathbb{E} \|\nabla F(\mathbf{w}^{t-1})\|_2^2 + 2L\eta^2 \sum_{s=1+[t-\tau_{\max}]_+}^t \mathbb{E} \|\nabla F(\mathbf{w}^{s-1})\|_2^2 + (4L\tau_{\max}\eta^2 + 4L^3\tau_{\max}^2\eta^4) \frac{\sigma^2}{n} \end{aligned}$$

$$-\frac{1}{2}\eta\mathbb{E}\left\|\frac{1}{n}\sum_{i=1}^n\nabla F_i(\mathbf{w}^{t-\tau_i(t)})\right\|_2^2+7L^2\tau_{\max}\eta^3\sum_{s=1+[t-2\tau_{\max}]_+}^t\mathbb{E}\left\|\frac{1}{n}\sum_{j=1}^n\nabla F_j(\mathbf{w}^{s-\tau_j(s)})\right\|_2^2, \quad (\text{S.19})$$

where the last inequality holds because  $\tau_{\max} \geq 1 \Rightarrow L\eta^2 + 3L\tau_{\max}\eta^2 \leq 4L\tau_{\max}\eta$  and by requiring the following stepsize conditions:

$$\eta \leq \frac{1}{32L} \iff \frac{1}{8}\eta - 2L\eta^2 \geq \frac{1}{16}\eta, \quad \eta \leq \frac{1}{4L} \iff 6L^2\tau_{\max}\eta^3 + 4L^3\tau_{\max}\eta^4 \leq 7L^2\tau_{\max}\eta^3. \quad (\text{S.20})$$

Summing up both sides of the inequality (S.19) for  $t = 1, \dots, T$  yields

$$\begin{aligned} & \mathbb{E}[F(\mathbf{w}^T)] - F(\mathbf{w}^0) \\ & \leq -\frac{1}{16}\eta\sum_{t=1}^T\mathbb{E}\|\nabla F(\mathbf{w}^{t-1})\|_2^2 + 2L\eta^2\sum_{t=1}^T\sum_{s=1+[t-\tau_{\max}]_+}^t\mathbb{E}\|\nabla F(\mathbf{w}^{s-1})\|_2^2 + \sum_{t=1}^T(4L\tau_{\max}\eta^2 + 4L^3\tau_{\max}^2\eta^4)\frac{\sigma^2}{n} \\ & \quad -\frac{1}{2}\eta\sum_{t=1}^T\mathbb{E}\left\|\frac{1}{n}\sum_{j=1}^n\nabla F_j(\mathbf{w}^{t-\tau_j(t)})\right\|_2^2 + 7L^2\tau_{\max}\eta^3\sum_{t=1}^T\sum_{s=1+[t-2\tau_{\max}]_+}^t\mathbb{E}\left\|\frac{1}{n}\sum_{j=1}^n\nabla F_j(\mathbf{w}^{s-\tau_j(s)})\right\|_2^2 \\ & \leq -\frac{1}{16}\eta\sum_{t=1}^T\mathbb{E}\|\nabla F(\mathbf{w}^{t-1})\|_2^2 + 2L\tau_{\max}\eta^2\sum_{t=1}^T\mathbb{E}\|\nabla F(\mathbf{w}^{t-1})\|_2^2 + \sum_{t=1}^T(4L\tau_{\max}\eta^2 + 4L^3\tau_{\max}^2\eta^4)\frac{\sigma^2}{n} \\ & \quad -\frac{1}{2}\eta\sum_{t=1}^T\mathbb{E}\left\|\frac{1}{n}\sum_{j=1}^n\nabla F_j(\mathbf{w}^{t-\tau_j(t)})\right\|_2^2 + 14L^2\tau_{\max}^2\eta^3\sum_{t=1}^T\mathbb{E}\left\|\frac{1}{n}\sum_{j=1}^n\nabla F_j(\mathbf{w}^{t-\tau_j(t)})\right\|_2^2 \\ & = -\left(\frac{1}{16}\eta - 2L\tau_{\max}\eta^2\right)\sum_{t=1}^T\mathbb{E}\|\nabla F(\mathbf{w}^{t-1})\|_2^2 + \sum_{t=1}^T(4L\tau_{\max}\eta^2 + 4L^3\tau_{\max}^2\eta^4)\frac{\sigma^2}{n} \\ & \quad -\left(\frac{1}{2}\eta - 14L^2\tau_{\max}^2\eta^3\right)\sum_{t=1}^T\mathbb{E}\left\|\frac{1}{n}\sum_{j=1}^n\nabla F_j(\mathbf{w}^{t-\tau_j(t)})\right\|_2^2 \\ & \leq -\frac{1}{32}\eta\sum_{t=1}^T\mathbb{E}\|\nabla F(\mathbf{w}^{t-1})\|_2^2 + \sum_{t=1}^T(4L\tau_{\max}\eta^2 + 4L^3\tau_{\max}^2\eta^4)\frac{\sigma^2}{n}, \end{aligned} \quad (\text{S.21})$$

where the second inequality uses the fact that  $\sum_{t=1}^T\sum_{s=1+[t-K]_+}^t a_s \leq K\sum_{t=1}^T a_t$  for  $a_1, \dots, a_T \geq 0$  and  $K \geq 1$ , and the last inequality holds by requiring the following stepsize conditions:

$$\eta \leq \frac{1}{64L\tau_{\max}} \iff \frac{1}{16}\eta - 2L\tau_{\max}\eta^2 \geq \frac{1}{32}\eta, \quad \eta \leq \frac{1}{\sqrt{28}L\tau_{\max}} \iff \frac{1}{2}\eta - 14L^2\tau_{\max}^2\eta^3 \geq 0. \quad (\text{S.22})$$

Note that the stepsize conditions (S.20) and (S.22) are uniformly implied by  $\eta \leq \frac{1}{64L\tau_{\max}}$ . Rearranging (S.21) and using Assumption 1, we obtain the convergence bound (13) in Theorem 1.  $\square$
