# Supplementary material
Source: Atypon-hosted journal article supplement (doi:10.1287/ijoc.2025.1443)

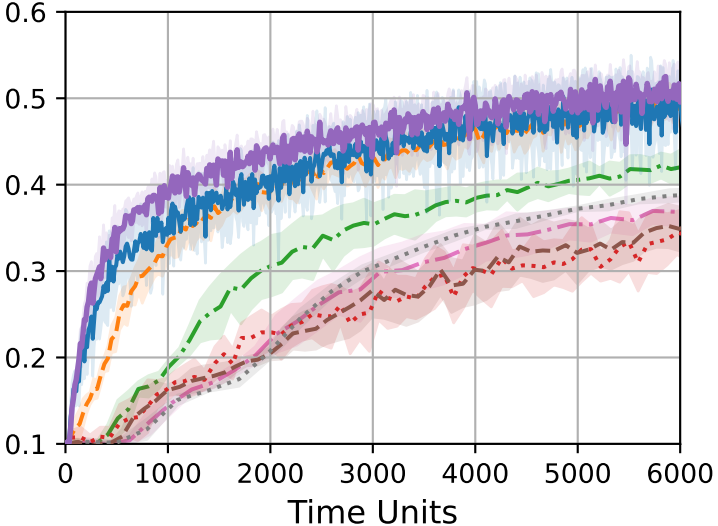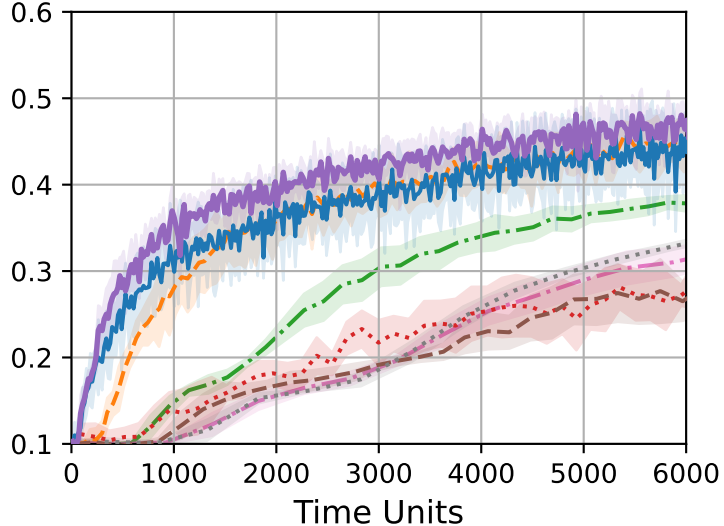

Supplement: ijoc.2025.1443.cd.zip [file cifar_n=10_alpha=0.1_std=1&5_acc.pdf › 2025.1443-main/results/figures/cifar_n=10_alpha=0.1_std=1&5_acc.pdf]

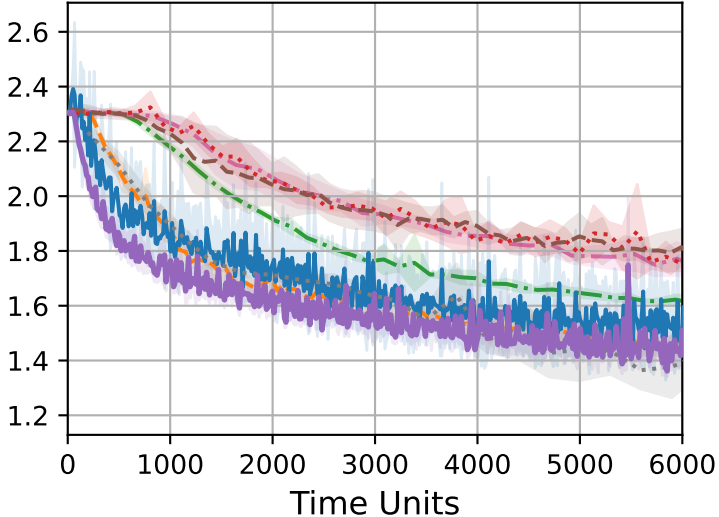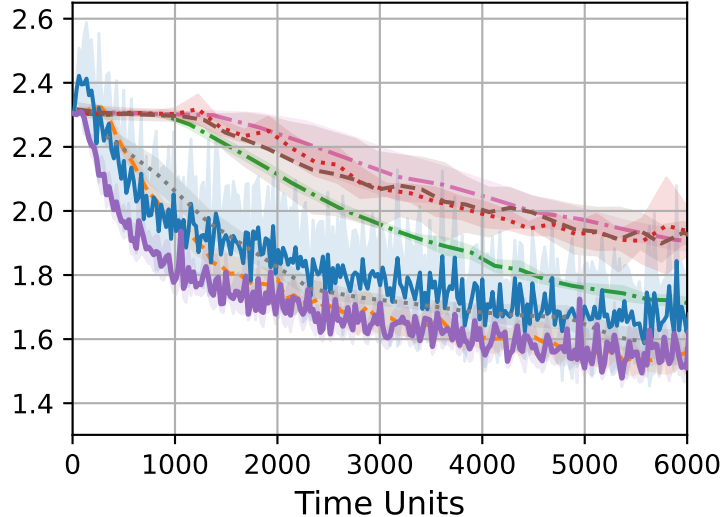

Supplement: ijoc.2025.1443.cd.zip [file cifar_n=10_alpha=0.1_std=1&5_loss.pdf › 2025.1443-main/results/figures/cifar_n=10_alpha=0.1_std=1&5_loss.pdf]

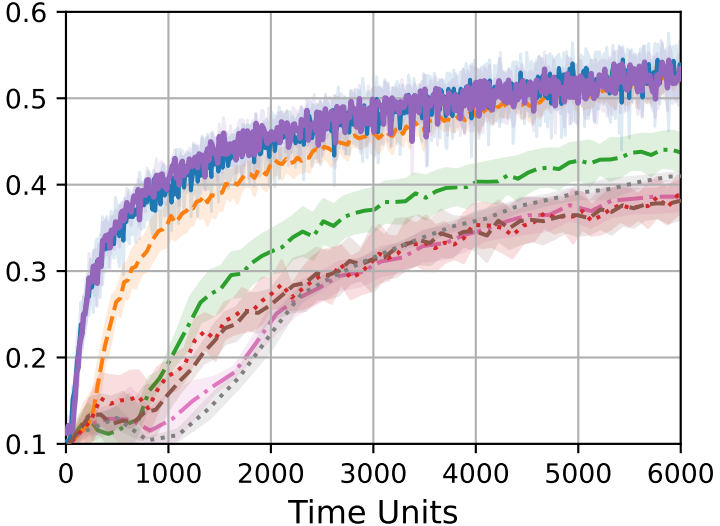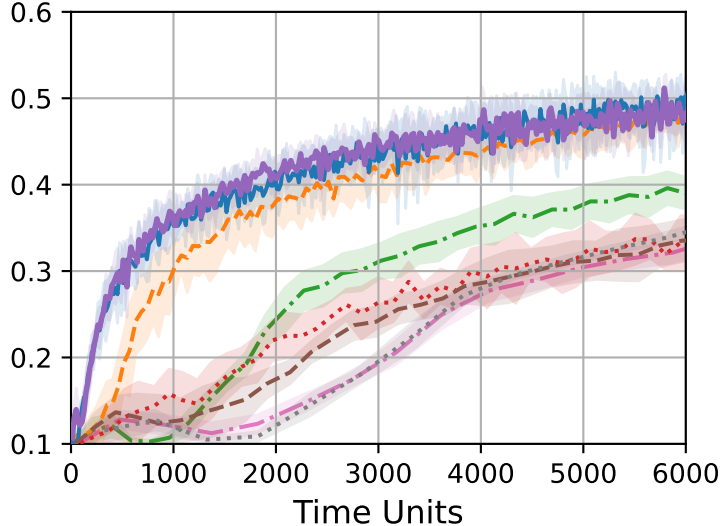

Supplement: ijoc.2025.1443.cd.zip [file cifar_n=10_alpha=0.5_std=1&5_acc.pdf › 2025.1443-main/results/figures/cifar_n=10_alpha=0.5_std=1&5_acc.pdf]

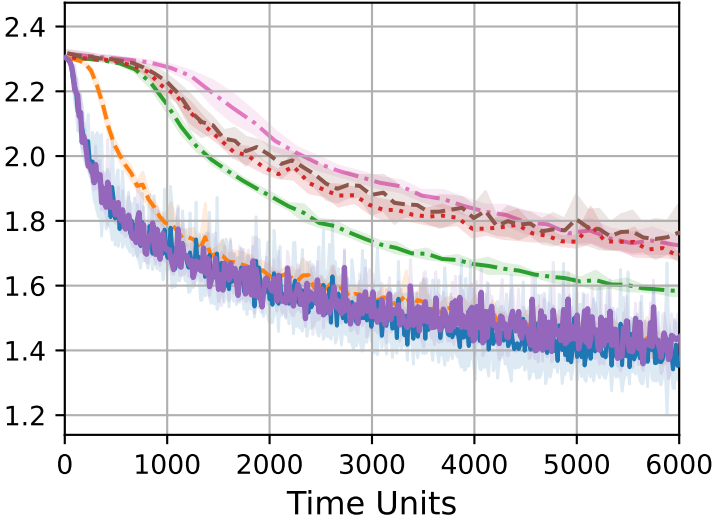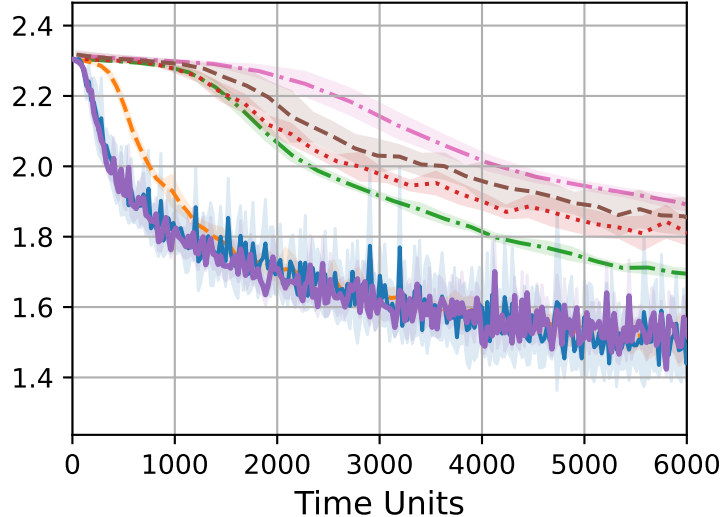

Supplement: ijoc.2025.1443.cd.zip [file cifar_n=10_alpha=0.5_std=1&5_loss.pdf › 2025.1443-main/results/figures/cifar_n=10_alpha=0.5_std=1&5_loss.pdf]

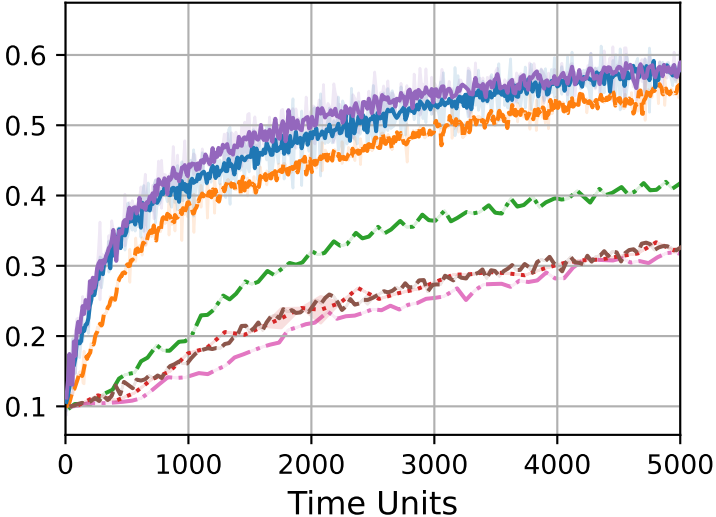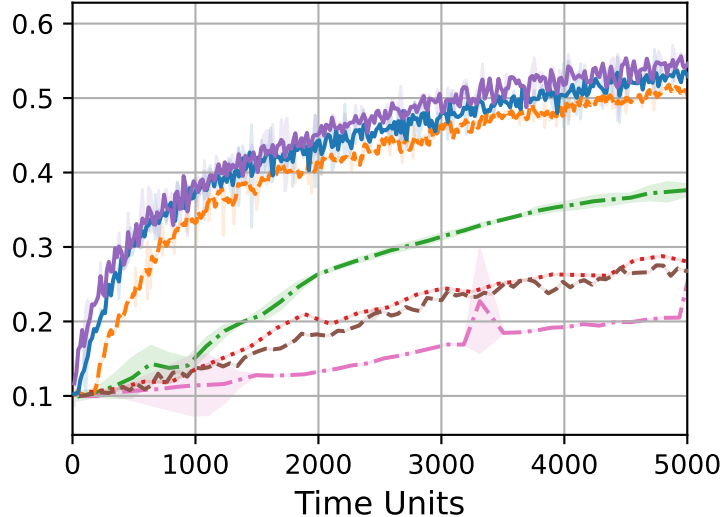

Supplement: ijoc.2025.1443.cd.zip [file cifar_n=30_alpha=0.05_std=1&5_acc.pdf › 2025.1443-main/results/figures/cifar_n=30_alpha=0.05_std=1&5_acc.pdf]

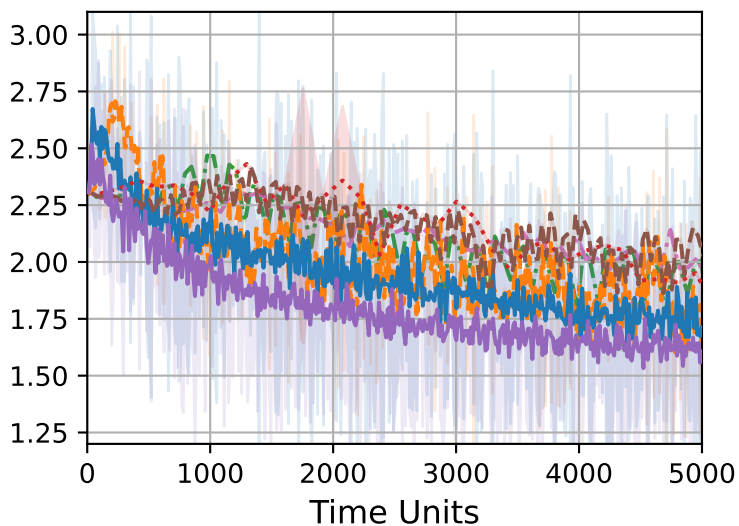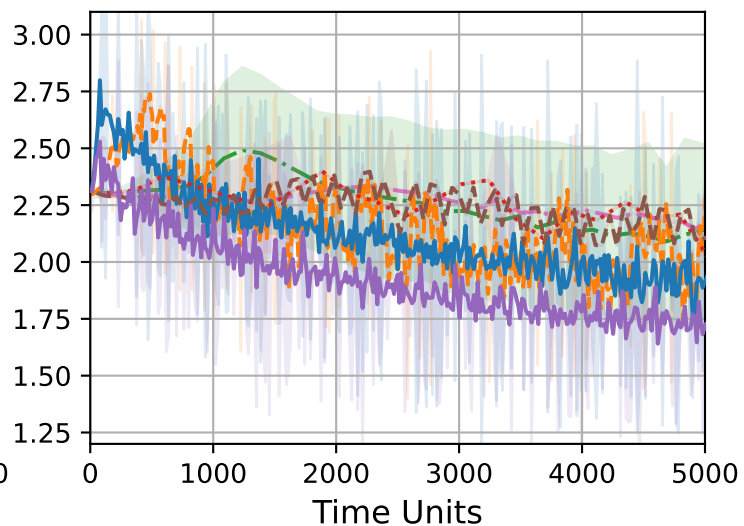

Supplement: ijoc.2025.1443.cd.zip [file cifar_n=30_alpha=0.05_std=1&5_loss.pdf › 2025.1443-main/results/figures/cifar_n=30_alpha=0.05_std=1&5_loss.pdf]

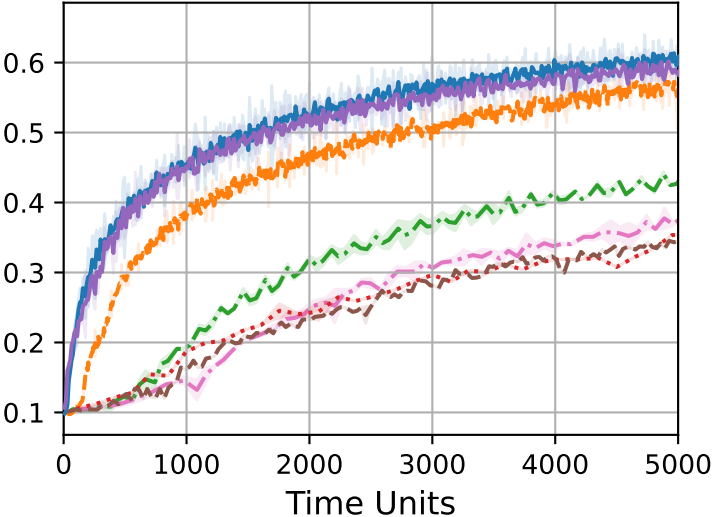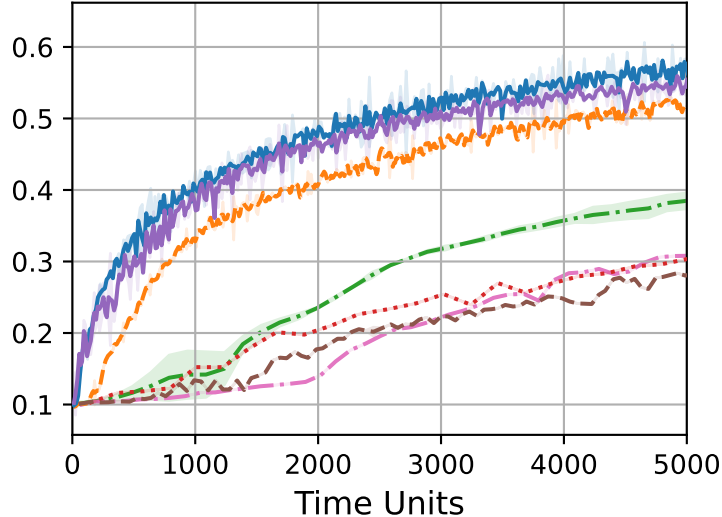

Supplement: ijoc.2025.1443.cd.zip [file cifar_n=30_alpha=0.1_std=1&5_acc.pdf › 2025.1443-main/results/figures/cifar_n=30_alpha=0.1_std=1&5_acc.pdf]

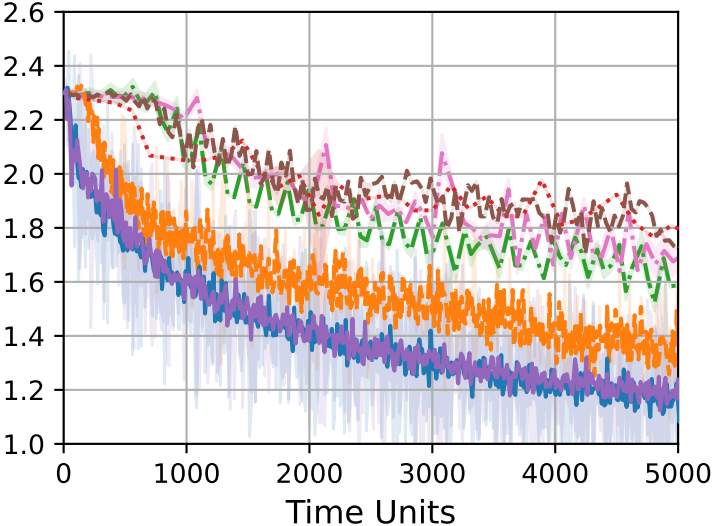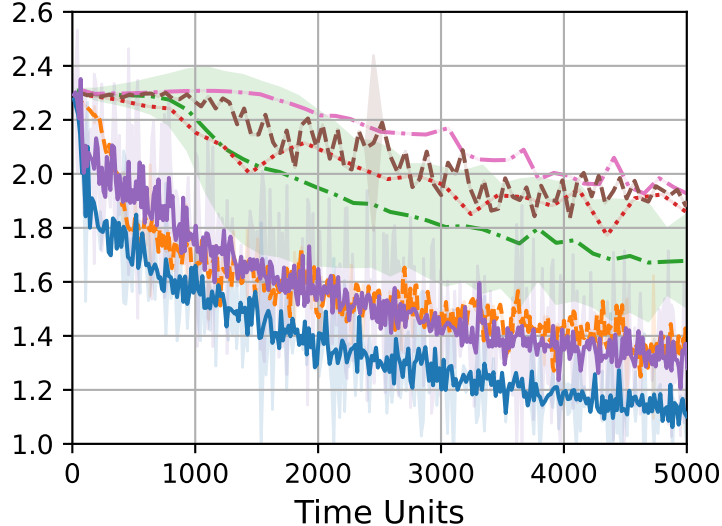

Supplement: ijoc.2025.1443.cd.zip [file cifar_n=30_alpha=0.1_std=1&5_loss.pdf › 2025.1443-main/results/figures/cifar_n=30_alpha=0.1_std=1&5_loss.pdf]

Test Accuracy

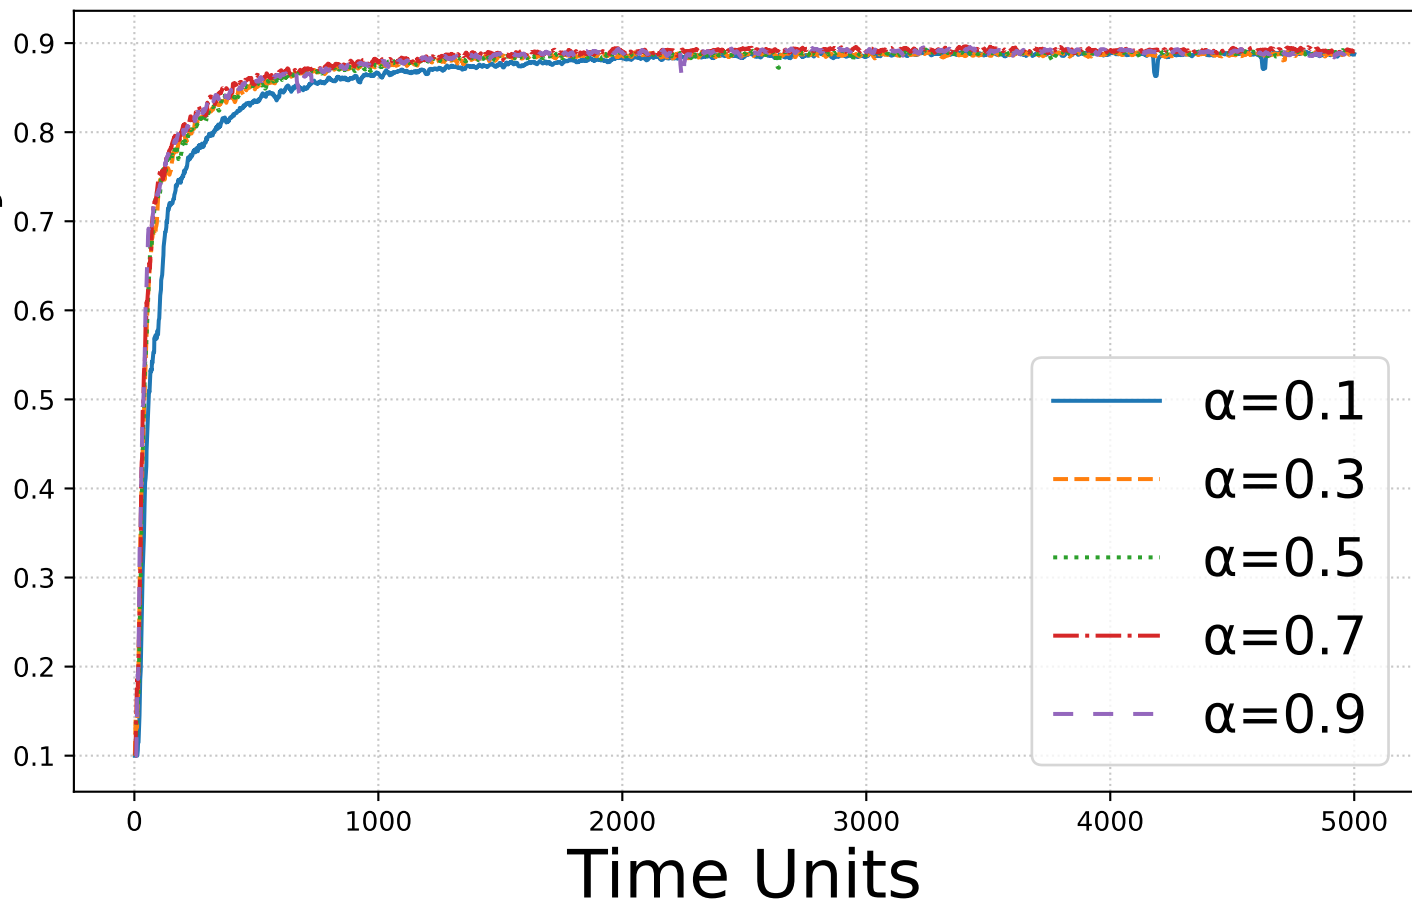

Supplement: ijoc.2025.1443.cd.zip [file proposed-normal(1,1)-fmnist-noniid-labeldir-cnn-test-acc.pdf › 2025.1443-main/results/figures/proposed-normal(1,1)-fmnist-noniid-labeldir-cnn-test-acc.pdf]

Training Loss

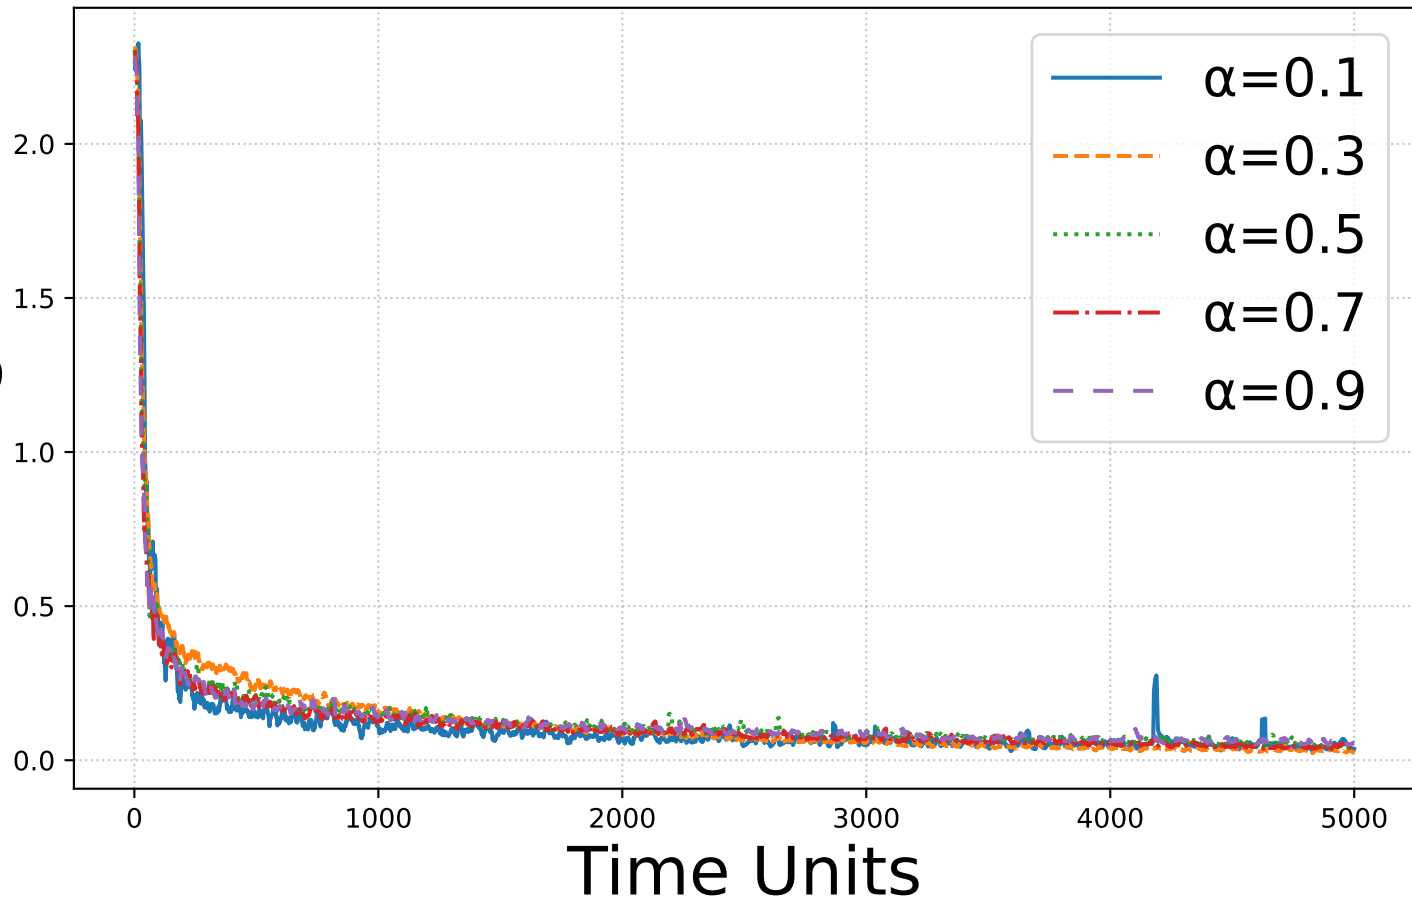

Supplement: ijoc.2025.1443.cd.zip [file proposed-normal(1,1)-fmnist-noniid-labeldir-cnn-train-loss.pdf › 2025.1443-main/results/figures/proposed-normal(1,1)-fmnist-noniid-labeldir-cnn-train-loss.pdf]

Test Accuracy

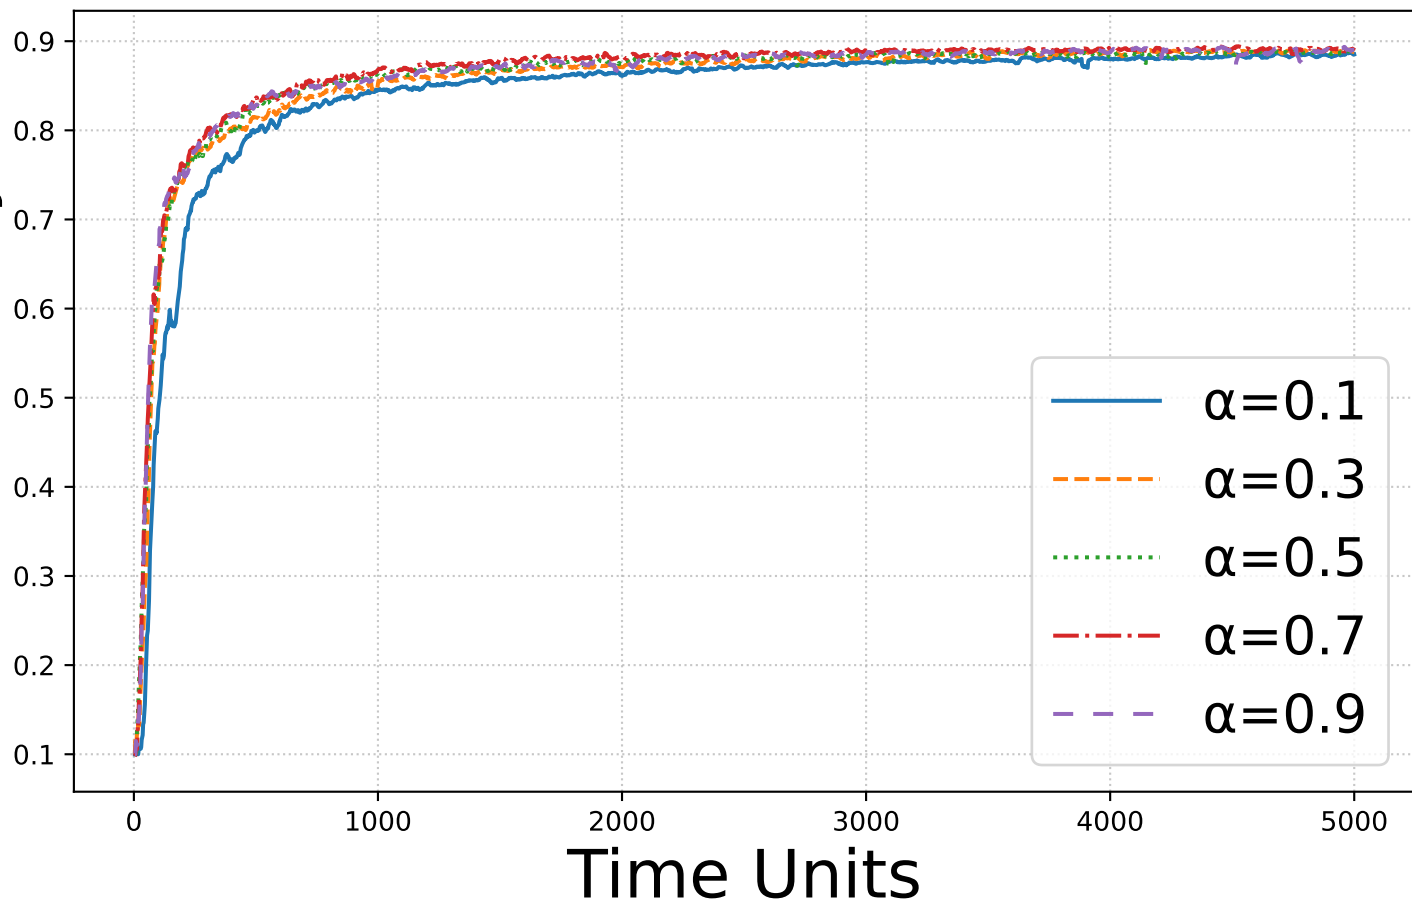

Supplement: ijoc.2025.1443.cd.zip [file proposed-normal(1,5)-fmnist-noniid-labeldir-cnn-test-acc.pdf › 2025.1443-main/results/figures/proposed-normal(1,5)-fmnist-noniid-labeldir-cnn-test-acc.pdf]

Training Loss

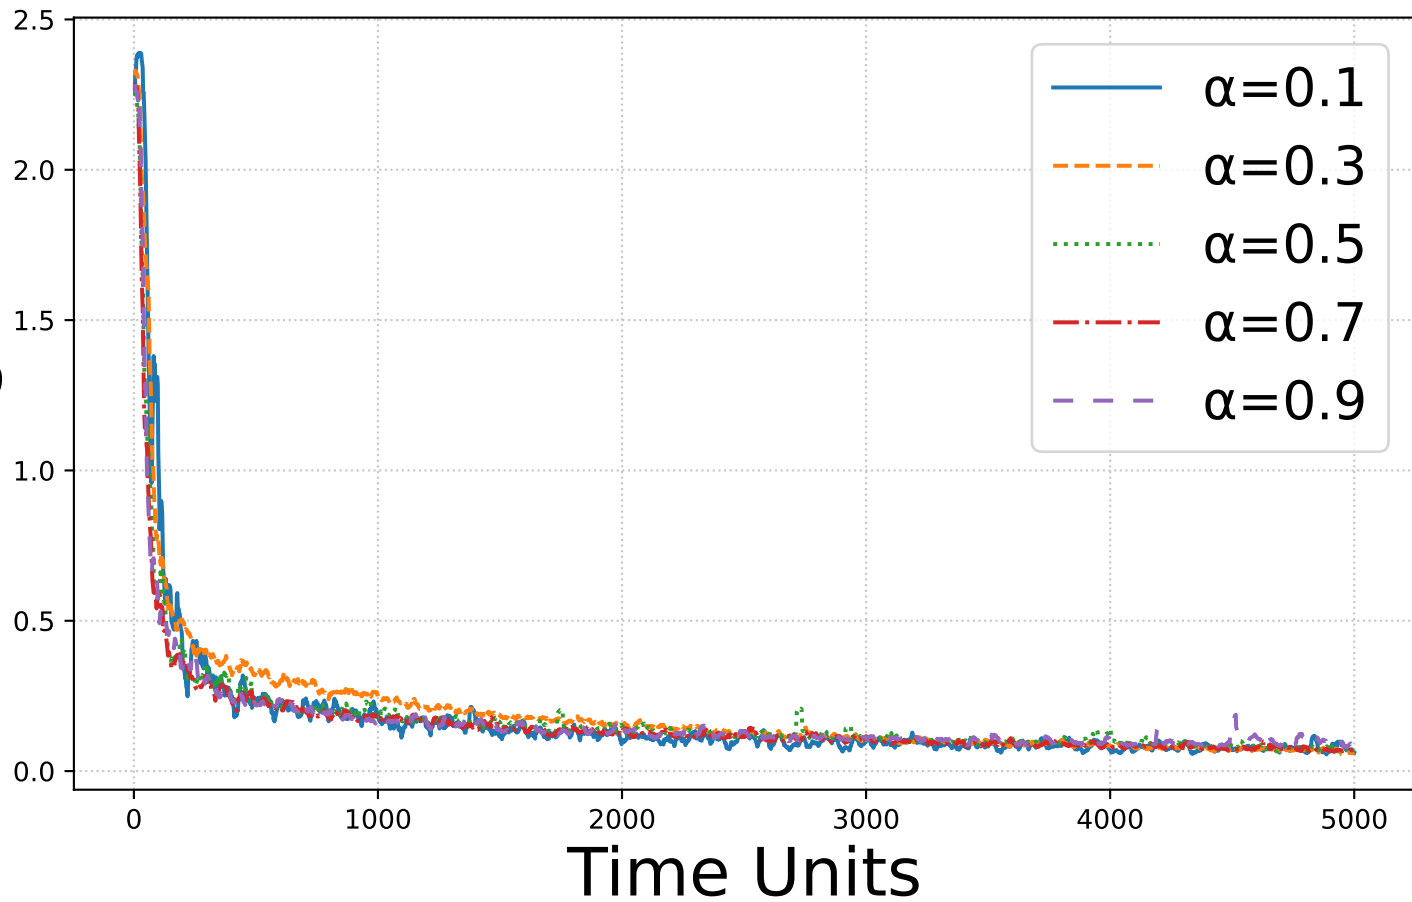

Supplement: ijoc.2025.1443.cd.zip [file proposed-normal(1,5)-fmnist-noniid-labeldir-cnn-train-loss.pdf › 2025.1443-main/results/figures/proposed-normal(1,5)-fmnist-noniid-labeldir-cnn-train-loss.pdf]
